# Supplementary material
Source: PubMed Central journal article supplement (PMC6811399)
Supplement: AAC.01362-19-s0001.pdf [file AAC.01362-19-s0001.pdf]

Table S1. Rates of nonsusceptibility to antimicrobial agents of *S. aureus* blood isolates

| Antimicrobial agent           | AST method | Total (n = 567, 100%)                 |                              |                              | MRSA (n = 303, 53.4%)                 |                              |                              | MSSA (n = 264, 46.6%)                 |                              |                              | P value <sup>a</sup> |
|-------------------------------|------------|---------------------------------------|------------------------------|------------------------------|---------------------------------------|------------------------------|------------------------------|---------------------------------------|------------------------------|------------------------------|----------------------|
|                               |            | Nonsusceptibility rate,<br>Number (%) | MIC <sub>50</sub><br>(µg/mL) | MIC <sub>90</sub><br>(µg/mL) | Nonsusceptibility rate,<br>Number (%) | MIC <sub>50</sub><br>(µg/mL) | MIC <sub>90</sub><br>(µg/mL) | Nonsusceptibility rate,<br>Number (%) | MIC <sub>50</sub><br>(µg/mL) | MIC <sub>90</sub><br>(µg/mL) |                      |
| Oxacillin                     | BMD        | 303 (53.4)                            | 32                           | >128                         | 303 (100)                             | >128                         | >128                         | 0 (0)                                 | 0.5                          | 1                            | -                    |
| Erythromycin                  | DD         | 252 (44.4)                            | NA                           | NA                           | 197 (65.0)                            | NA                           | NA                           | 55 (20.8)                             | NA                           | NA                           | <0.001               |
| Clindamycin                   | DD         | 180 (31.7)                            | NA                           | NA                           | 168 (55.4)                            | NA                           | NA                           | 12 (4.6)                              | NA                           | NA                           | <0.001               |
| Quinupristin-dalfopristin     | DD         | 9 (1.6)                               | NA                           | NA                           | 5 (1.7)                               | NA                           | NA                           | 4 (1.5)                               | NA                           | NA                           | 0.357                |
| Trimethoprim-sulfamethoxazole | DD         | 7 (1.2)                               | NA                           | NA                           | 6 (2.0)                               | NA                           | NA                           | 1 (0.4)                               | NA                           | NA                           | 0.111                |
| Linezolid                     | BMD        | 2 (0.4)                               | 2                            | 2                            | 1 (0.3)                               | 2                            | 4                            | 1 (0.4)                               | 2                            | 2                            | 0.999                |
| Tigecycline                   | BMD        | 6 (1.1)                               | 0.06                         | 0.25                         | 6 (2.0)                               | 0.06                         | 0.25                         | 0 (0)                                 | 0.06                         | 0.06                         | 0.071                |
| Vancomycin                    | BMD        | 0 (0)                                 | 1                            | 1                            | 0 (0)                                 | 1                            | 2                            | 0 (0)                                 | 1                            | 1                            | -                    |
| Teicoplanin                   | BMD        | 0 (0)                                 | 1                            | 4                            | 0 (0)                                 | 2                            | 4                            | 0 (0)                                 | 0.5                          | 1                            | -                    |
| Daptomycin                    | BMD        | 0 (0)                                 | 0.25                         | 0.5                          | 0 (0)                                 | 0.5                          | 0.5                          | 0 (0)                                 | 0.25                         | 0.5                          | -                    |

<sup>a</sup>The difference of nonsusceptibility rates to each antimicrobial agent between MRSA and MSSA isolates was evaluated by Fisher's exact tests.

Abbreviations: AST, antimicrobial susceptibility testing; BMD, broth microdilution; DD, disk diffusion; MIC, minimum inhibitory concentration; MRSA, methicillin-resistant *S. aureus*; MSSA, methicillin-susceptible *S. aureus*; NA, not applicable.

Table S2. Oligonucleotide sequences of the primers used in this study

| Target gene             | Primer name | Primer sequence                 | Amplicon size (bp)   |
|-------------------------|-------------|---------------------------------|----------------------|
| <i>mecA</i>             | mecA_P4     | TCCAGATTACAACCTTCACCAGG         | 162                  |
|                         | mecA_P7     | CCACTTCATATCTTGTAACG            |                      |
| <i>mecC</i>             | mecC_F      | GAAAAAAAGGCTTAGAACGCCTC         | 138                  |
|                         | mecC_R      | GAAGATCTTTTCCGTTTTTCAGC         |                      |
| <i>ccr1-3</i>           | ccrAB-β2    | ATTGCCTTGATAATAGCCITCT          | Multi-F <sup>a</sup> |
|                         | ccrAB-2     | AACCTATATCATCAATCAGTACGT        | 695                  |
|                         | ccrAB-3     | TAAAGGCATCAATGCACAAACACT        | 937                  |
|                         | ccrAB-4     | AGCTCAAAGCAAGCAATAGAAT          | 1791                 |
| <i>ccrC</i>             | γR          | CCTTTATAGACTGGATTATTCAAAATAT    | 518                  |
|                         | γF          | CGTCTATTACAAGATGTTAAGGATAAT     |                      |
| <i>ccr4</i>             | α4.2        | GTATCAATGCACCAGAACTT            | 1287                 |
|                         | β4.2        | TTGCGACTCTCTTGCGGTTT            |                      |
| <i>mec gene complex</i> | mA7         | ATATACCAAACCCGACAACTACA         | Multi-F <sup>a</sup> |
|                         | mI6         | CATAACTTCCCATTTCTGCAGATG        | 1963                 |
|                         | IS7         | ATGCTTAATGATAGCATCCGAATG        | 2827                 |
|                         | IS2(iS-2)   | TGAGGTTATTGAGATATTTTCGATGT      | 804                  |
| <i>agr</i>              | PanF        | ATGCACATGGTGCACATGC             | Multi-F <sup>a</sup> |
|                         | agr1        | GTCACAAGTACTATAAGCTGCGAT        | 439                  |
|                         | agr2        | TATTACTAATTGAAAAGTGGCCATAGC     | 574                  |
|                         | agr3        | GTAATGTAATAGCTTGTATAATAATACCCAG | 321                  |
|                         | agr4        | CGATAATGCCGTAATACCCG            | 657                  |
| <i>pvl</i>              | luk-PV-1    | ATCATTAGGTAAAATGTCTGGACATGATCCA | 433                  |
|                         | luk-PV-2    | GCATCAASTGTATTGGATAGCAAAGC      |                      |
| <i>tst-1</i>            | TSST-F      | ATGGCAGCATCAGCTTGATA            | 350                  |
|                         | TSST-R      | TTTCCAATAACCACCCGTTT            |                      |
| <i>sea</i>              | sea-F       | CCTTTGGAAACGGTTAAAACG           | 127                  |
|                         | sea-R       | TCTGAACCTTCCCATCAAAAAC          |                      |
| <i>seb</i>              | seb-F       | TCGCATCAAACCTGACAAACG           | 477                  |
|                         | seb-R       | GCAGGTAATCTATAAGTGCCTGC         |                      |
| <i>sec</i>              | sec-F       | CTCAAGAACTAGACATAAAAGCTAGG      | 271                  |
|                         | sec-R       | TCAAATCGGATTAACATTATCC          |                      |
| <i>sed</i>              | sed-F       | CTAGTTTGGTAATATCTCCTTTAAACG     | 319                  |
|                         | sed-R       | TTAATGCTATATCTTATAGGGTAAACATC   |                      |
| <i>see</i>              | see-F       | CAGTACCTATAGATAAAGTTAAAACAAGC   | 178                  |
|                         | see-R       | TAACCTACCGTGGACCCTTC            |                      |
| <i>seg</i>              | seg-F       | CGTCTCCACCTGTTGAAGG             | 327                  |
|                         | seg-R       | CCAAGTGATTGTCTATTGTCG           |                      |
| <i>seh</i>              | seh-F       | CAACTGCTGATTTAGCTCAG            | 360                  |
|                         | seh-R       | GTCGAATGAGTAATCTCTAGG           |                      |
| <i>sei</i>              | sei-F       | CAACTCGAATTTTCAACAGGTAC         | 465                  |
|                         | sei-R       | CAGGCAGTCCATCTCCTG              |                      |
| <i>sej</i>              | sej-F       | CATCAGAACTGTTGTTCCGCTAG         | 142                  |
|                         | sej-R       | CTGAATTTTACCATCAAAGGTAC         |                      |

<sup>a</sup>The primers described as “Multi-F” indicate the forward primers in each set of multiplex PCRs.

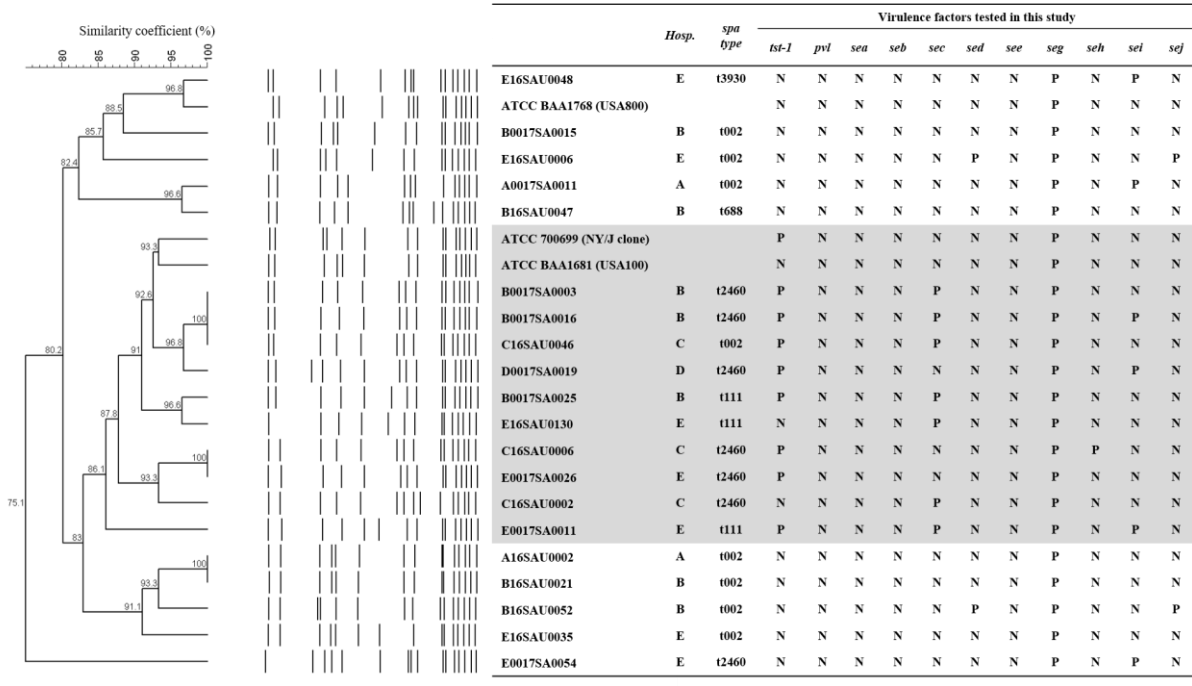

Figure S1. *SmaI*-macrorestriction banding patterns of CC5 MRSA isolates by PFGE.

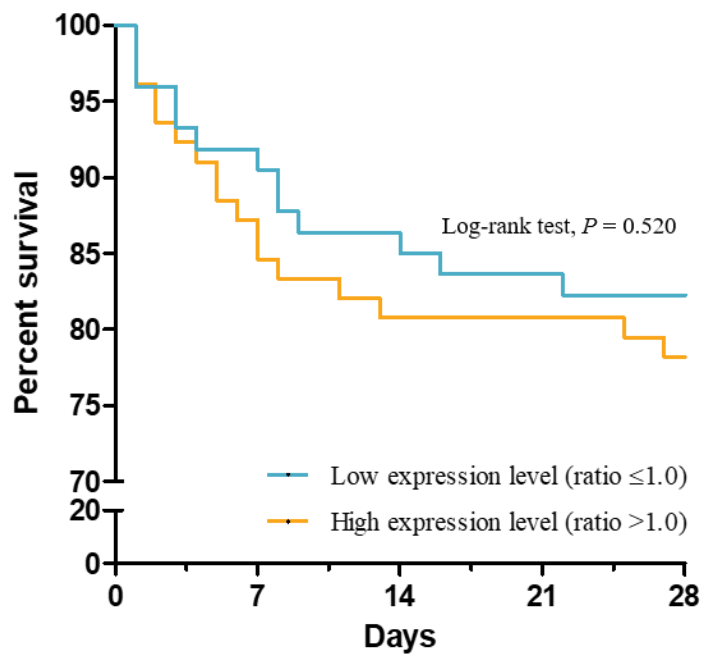

Figure S2. Kaplan-Meier curves stratified according to the expression level of TSST-1 in patients with *S. aureus* bloodstream infections.
